# Supplementary material
Source: publisher site journal article supplement (https://www.dovepress.com/article/298597)
Supplement: Supplementary file 1 [file get_supplementary_file.php]

**Table S1** Association of *CDHR3*, *CACNAC1*, and *LTA* SNPs with warfarin responsiveness during the initiation phase of therapy of 212 cardiovascular patients treated with warfarin

| **Gene** | **SNP** | **Genotype** | **Sensitive** | **Moderate** | **Resistance** | **Overall**  ***P-value**** |
| --- | --- | --- | --- | --- | --- | --- |
| *CDHR3* | rs10270308 | CT | (3/14) 21.4% | (11/14) 78.6% | (0/14) 0.0% | 0.799 |
| P-value* | 0.96 | 0.98 | 0.66 |
| TT | (11/196) 5.6% | (149/196) 76% | (36/196) 18.4% |
| P-value* | 0.96 | 0.98 | 0.66 |
| *CACNAC1* | rs216013 | AA | (24/39) 61.5% | (13/39) 33.3% | (2/39) 5.1% | 0.409 |
| P-value* | 0.51 | 0.56 | 0.87 |
| AG | (90/161) 55.9% | (63/161) 39.1% | (8/161) 5% |
| P-value* | 0.61 | 0.36 | 0.42 |
| GG | (6/11) 54.5% | (3/11) 27.3% | (2/11) 18.2% |
| P-value* | 0.87 | 0.47 | 0.07 |
| *LTA* | rs1041981 | AA | (3/20) 15% | (16/20) 80% | (1/20) 5% | 0.195 |
| P-value* | 0.68 | 0.69 | 0.96 |
| CA | (25/106) 23.6% | (78/106) 73.6% | (3/106) 2.8% |
| P-value* | 0.05 | 0.33 | 0.12 |
| CC | (11/86) 12.8% | (68/86) 79.1% | (7/86) 8.1% |
| P-value* | 0.08 | 0.45 | 0.11 |
| * Chi-square test with P-value < 0.05 is considered significant. | | | | | | |

**Table S2** Association of *CDHR3*, *CACNAC1,* and *LTA* SNPs with warfarin responsiveness during the stabilization phase of therapy of 139 cardiovascular patients treated with warfarin

| **Gene SNP** | **Genotype** | **Poora** | **Goodb** | **Ultrac** | **Overall**  ***P-value**** |
| --- | --- | --- | --- | --- | --- |
| *CDHR3* rs10270308 | CT | (0/9) 0.0% | (9/9) 100% | (0/9) 0.0% | 0.758 |
| P-value* | 0.42 | 0.27 | 0.48 |
| TT | (9/128) 7% | (113/128) 88.3% | (6/128) 4.7% |
| P-value* | 0.42 | 0.27 | 0.48 |
| *CACNAC1* rs216013 | AA | (5/77) 6.5% | (68/77) 88.3% | (4/77) 5.2% | 0.417 |
| P-value* | 1 | 0.76 | 0.62 |
| AG | (4/55) 7.3% | (50/55) 90.9% | (1/55) 1.8% |
| P-value* | 0.76 | 0.62 | 0.23 |
| GG | (0/6) 0.0% | (5/6) 83.3% | (1/6) 16.7% |
| P-value* | 0.48 | 0.62 | 0.13 |
| *LTA* rs1041981 | AA | (2/17) 11.8% | (14/17) 82.4% | (1/17) 5.9% | 0.385 |
| P-value* | 0.37 | 0.32 | 0.76 |
| CA | (5/69) 7.2% | (63/69) 91.3% | (1/69) 1.4% |
| P-value* | 0.69 | 0.42 | 0.09 |
| CC | (2/53) 3.8% | (47/53) 88.7% | (4/53) 7.5% |
| P-value* | 0.32 | 0.84 | 0.13 |

* Chi-square test with P-value < 0.05 is considered significant.

a Poor responders (international normalized ratio (INR) value below target).

b Good responders who have an INR in the target range (therapeutic range).

c Ultra-responders (INR over target).

**Table S3** Association of CDHR3, CACNAC1, and LTA SNPs with INR treatment outcome

| **Gene** | **SNP** | **Genotype** | **Initiation**  **INR** | **Overall**  ***P-value**** | **Maintenance**  **INR** | **Overall**  ***P-value**** |
| --- | --- | --- | --- | --- | --- | --- |
| *CDHR3* | rs10270308 | CT | 2.26 [064] | 0.321 | 2.7 [0.39] | 0.980 |
| TT | 2.47 [0.78] | 2.7 [0.36] |
| *CACNAC1* | rs216013 | AA | 2.50 [0.81] | 0.612 | 2.71 [0.41] | 0.065 |
| AG | 2.40 [0.74] | 2.65 [0.35] |
| GG | 2.38 [0.63] | 3.03 [0.28] |
| *LTA* | rs1041981 | AA | 2.44 [0.65] | 0.787 | 2.72 [0.41] | 0.709 |
| CA | 2.42 [0.76] | 2.68 [0.40] |
| CC | 2.50 [0.82] | 2.63 [0.24] |
| * One-way ANOVA test with P-value < 0.05 is considered significant, mean standard deviation in square brackets. | | | | | | |

**Table S4** Post Hoc tests for the association of *CDHR3*, *CACNAC1,* and *LTA* SNPs with INR treatment outcome

| GENE | SNP-ID | Genotype | | Initiation INR  *P-value** | Maintenance INR  *P-value** |
| --- | --- | --- | --- | --- | --- |
| *CACNAC1* | rs216013 | AA | AG | 0.63 | 0.66 |
| GG | 0.85 | 0.11 |
| AG | AA | 0.63 | 0.66 |
| GG | 0.99 | 0.05 |
| GG | AA | 0.85 | 0.11 |
| AG | 0.99 | 0.05 |
| *LTA* | rs1041981 | AA | CA | 0.99 | 0.89 |
| CC | 0.95 | 0.71 |
| CA | AA | 0.99 | 0.89 |
| CC | 0.77 | 0.86 |
| CC | AA | 0.95 | 0.71 |
| CA | 0.77 | 0.86 |
| * Post-Hock multiple comparisons test with p<0.05 is considered significant. Compare initiation and maintenance dose among all genotypes. Post hock are not performed for rs10270308 because its fewer than three groups | | | | | |
